# Supplementary material for: Genetic alteration, RNA expression, and DNA methylation profiling of coronavirus disease 2019 (COVID-19) receptor ACE2 in malignancies: a pan-cancer analysis
Source: Springer Nature journal article supplement (doi:10.1186/s13045-020-00883-5), 2020-05-04

# Figure S2

A

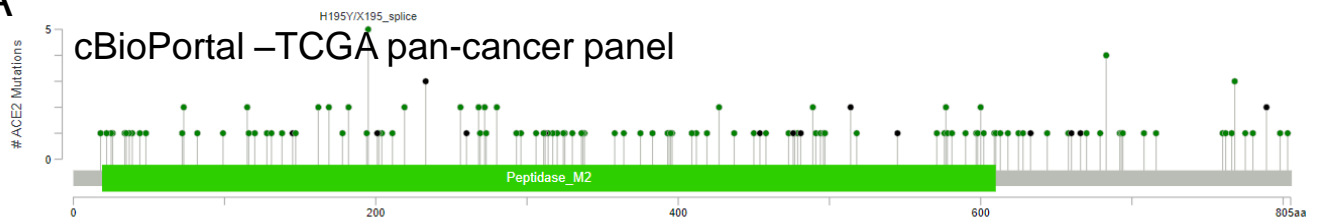

H195Y / X195\_splice

| Study               | Sample ID       | Cancer Type                    | Protein Change | Annotation            | Mutation Type | Copy #  | COSMIC | Allele Freq (T) | # Mut in Sample |
|---------------------|-----------------|--------------------------------|----------------|-----------------------|---------------|---------|--------|-----------------|-----------------|
| Colorectal Adeno... | TCGA-AG-A002-01 | Rectal Adenocarcinoma          | H195Y          | <input type="radio"/> | Missense      | Diploid | 2      | 0.84            | 11438           |
| Skin Cutaneous M... | TCGA-EE-A29N-06 | Cutaneous Melanoma             | H195Y          | <input type="radio"/> | Missense      | Diploid | 2      | 0.39            | 575             |
| Uterine Corpus E... | TCGA-AP-A1E0-01 | Uterine Endometrioid Carcinoma | H195Y          | <input type="radio"/> | Missense      | Diploid | 2      | 0.61            | 4834            |
| Lung Squamous Ce... | TCGA-L3-A524-01 | Lung Squamous Cell Carcinoma   | X195_splice    | <input type="radio"/> | Splice        | Diploid |        | 0.30            | 299             |
| Liver Hepatocell... | TCGA-DD-AAW2-01 | Hepatocellular Carcinoma       | X195_splice    | <input type="radio"/> | Splice        | Gain    |        | 0.90            | 116             |

B

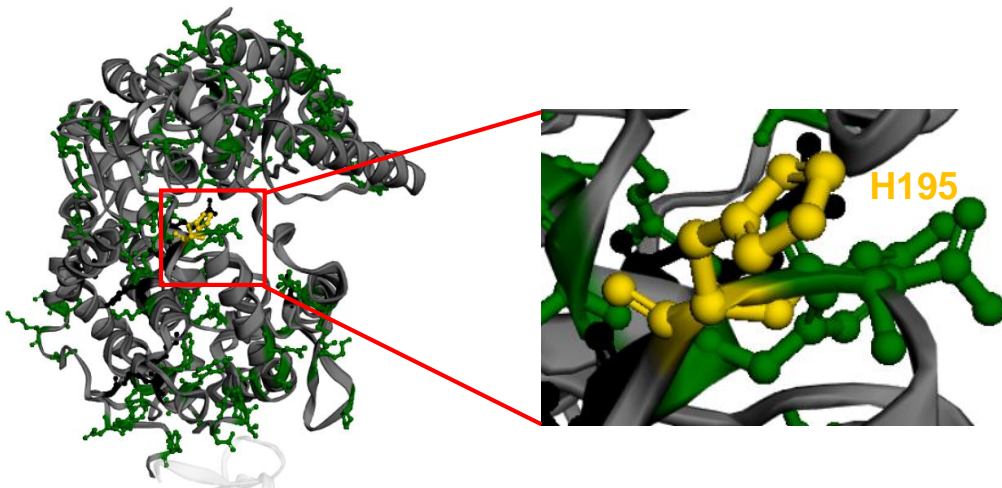

C

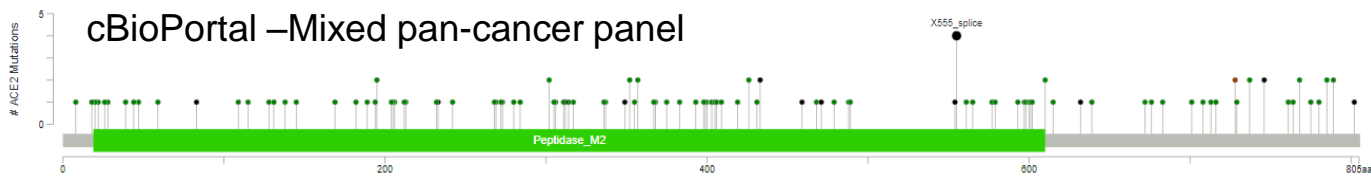

X555\_splice

| Study               | Sample ID           | Cancer Type               | Protein Change | Annotation            | Mutation Type | Copy # | COSMIC | Allele Freq (T) | # Mut in Sample |
|---------------------|---------------------|---------------------------|----------------|-----------------------|---------------|--------|--------|-----------------|-----------------|
| Colorectal Adeno... | coadread_dfcl_20... | Colorectal Adenocarcinoma | X555_splice    | <input type="radio"/> | Splice        |        |        |                 | 1481            |
| Colorectal Adeno... | coadread_dfcl_20... | Colorectal Adenocarcinoma | X555_splice    | <input type="radio"/> | Splice        |        |        |                 | 72              |
| Pancreatic Adeno... | ICGC_0548           | Pancreatic Adenocarcinoma | X555_splice    | <input type="radio"/> | Splice        |        |        |                 | 984             |
| Basal Cell Card...  | 5-PT035-T1          | Skin Cancer, Non-Melanoma | X555_splice    | <input type="radio"/> | Splice        |        |        | 0.27            | 2023            |

Showing 1-4 of 4 Mutations

D

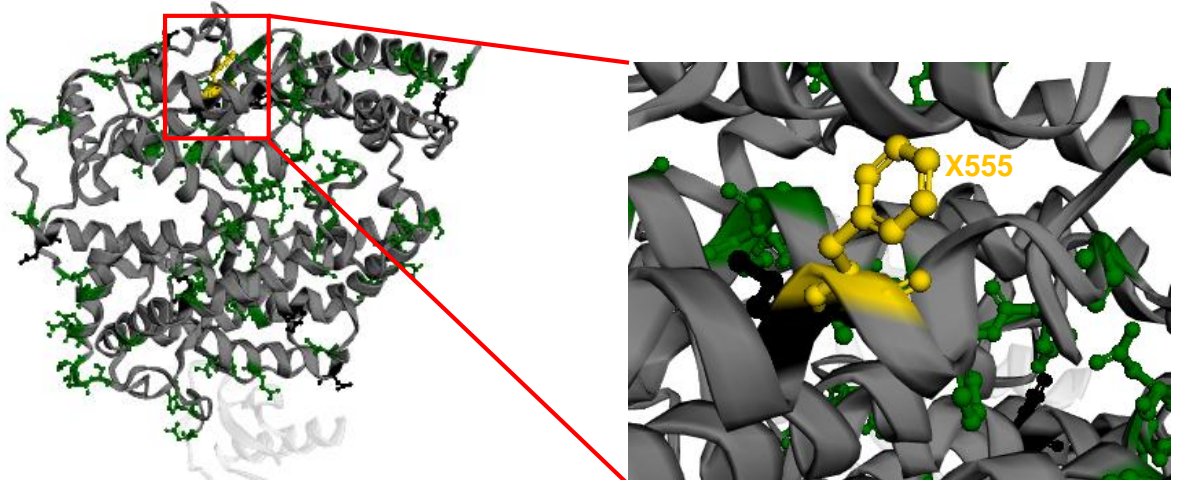

Figure S3

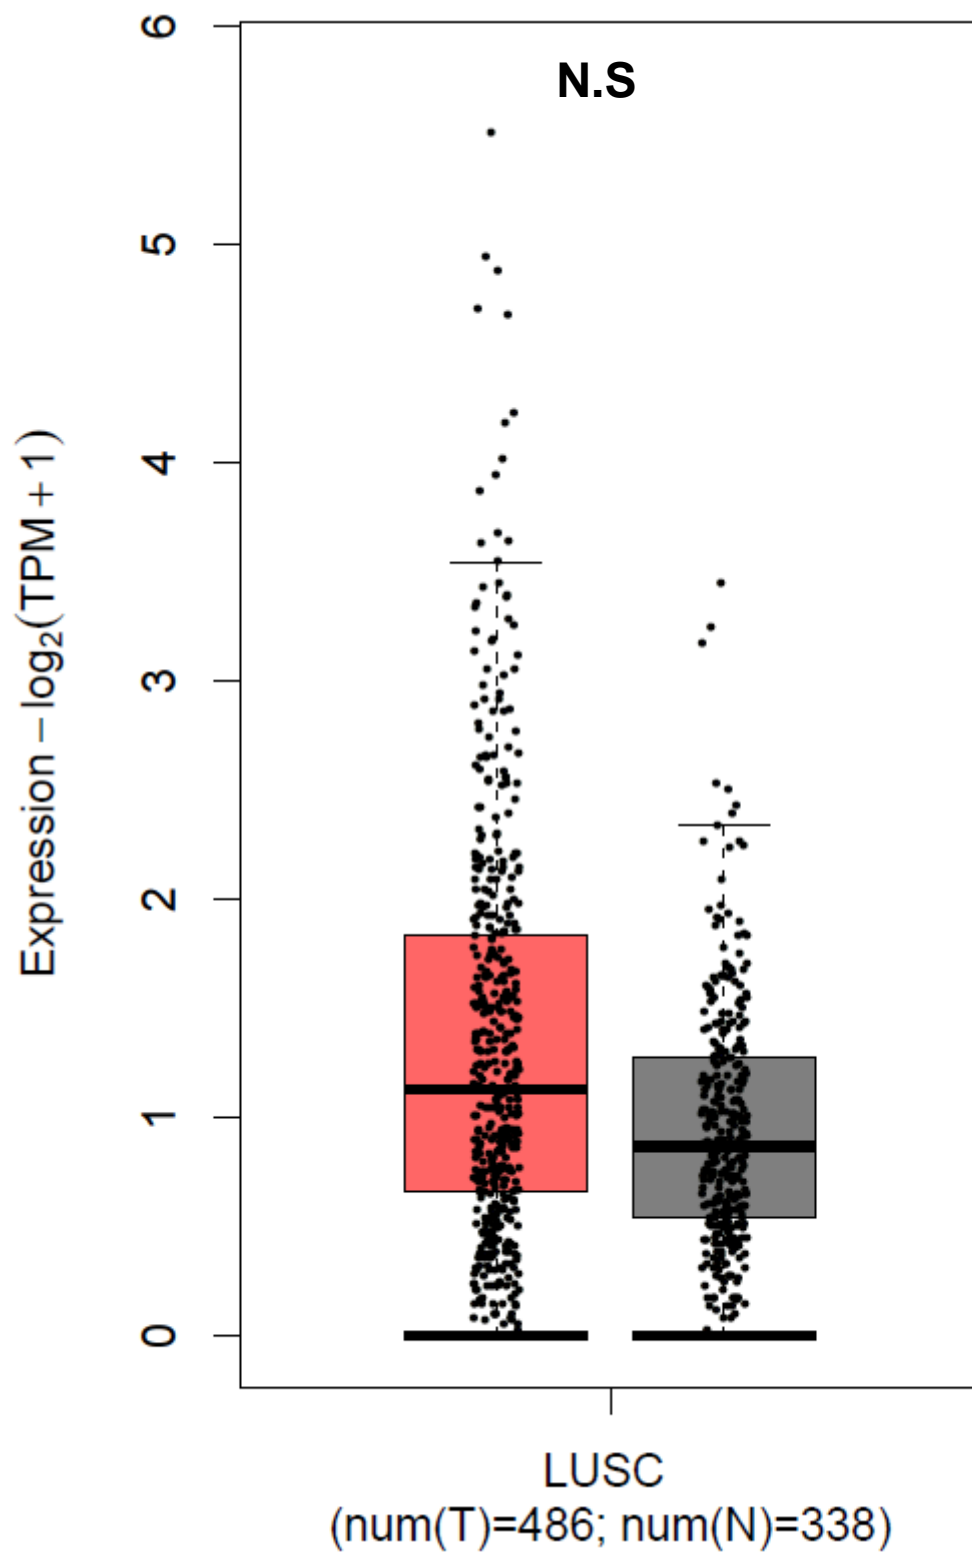

Figure S4

# ACE2 Mutations

A

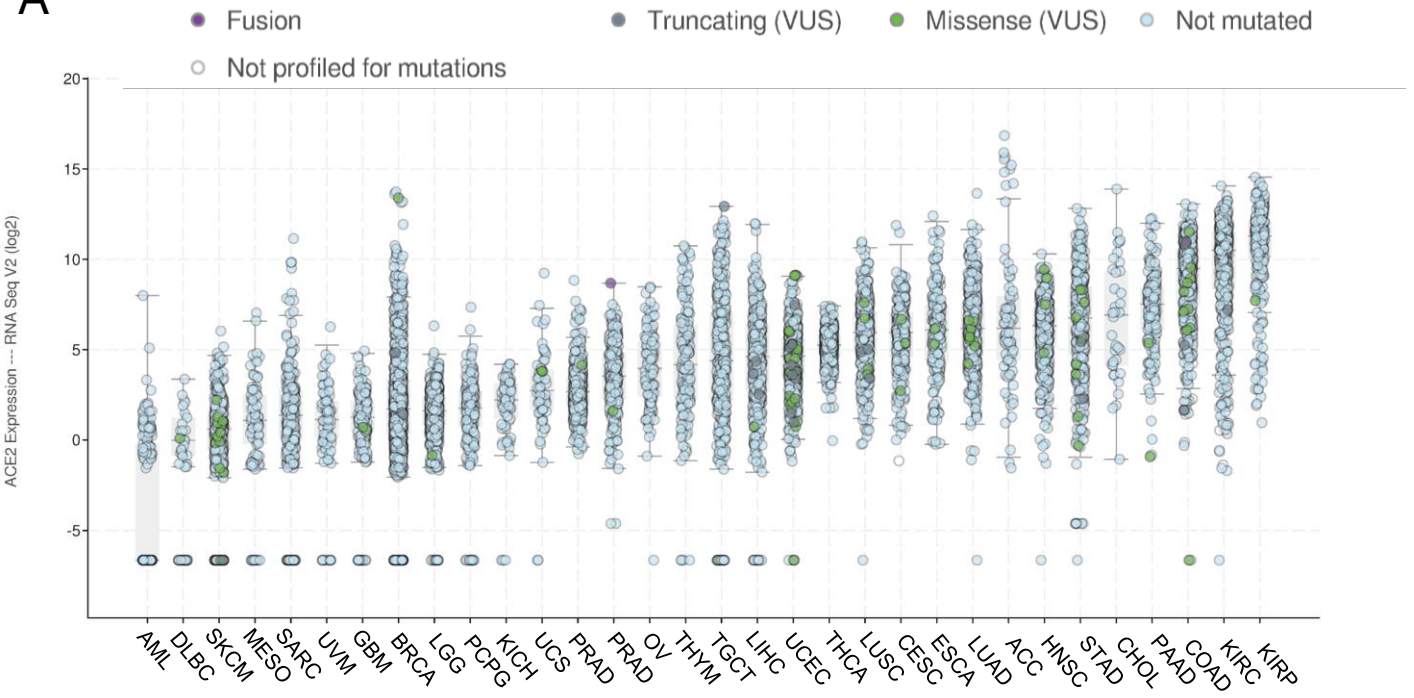

B

# Copy number alteration of ACE2

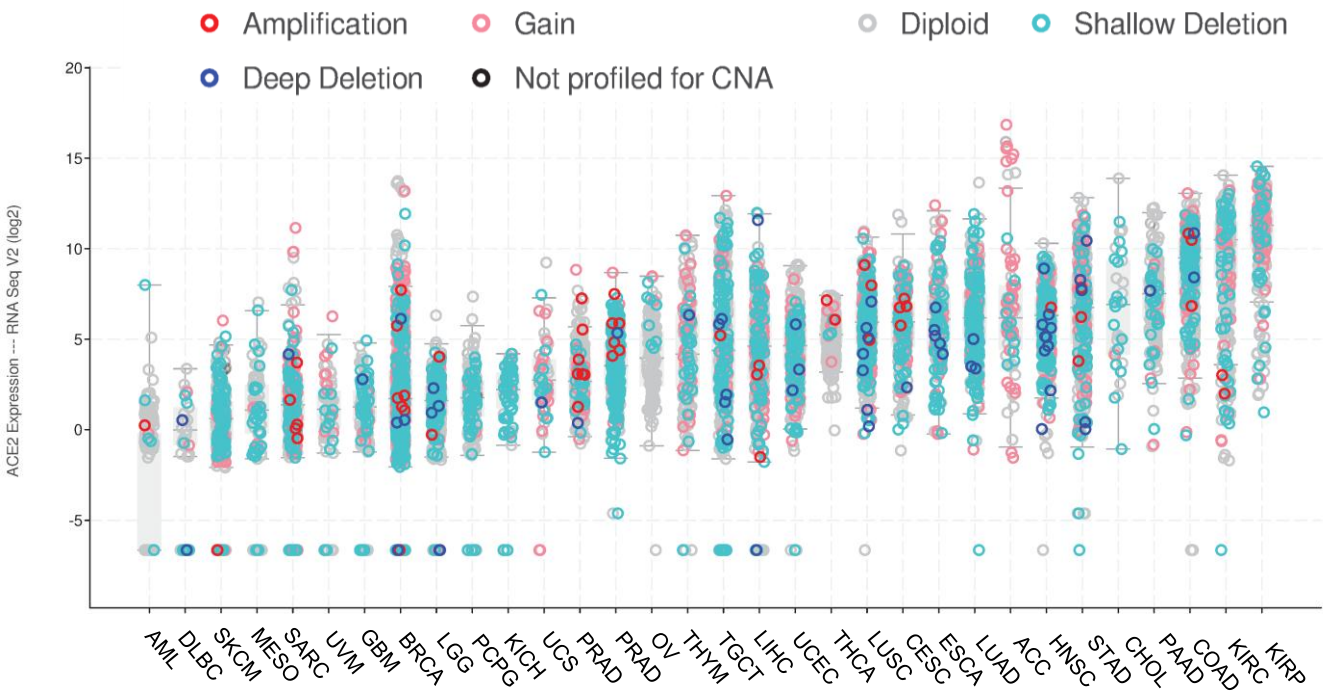

Figure S5

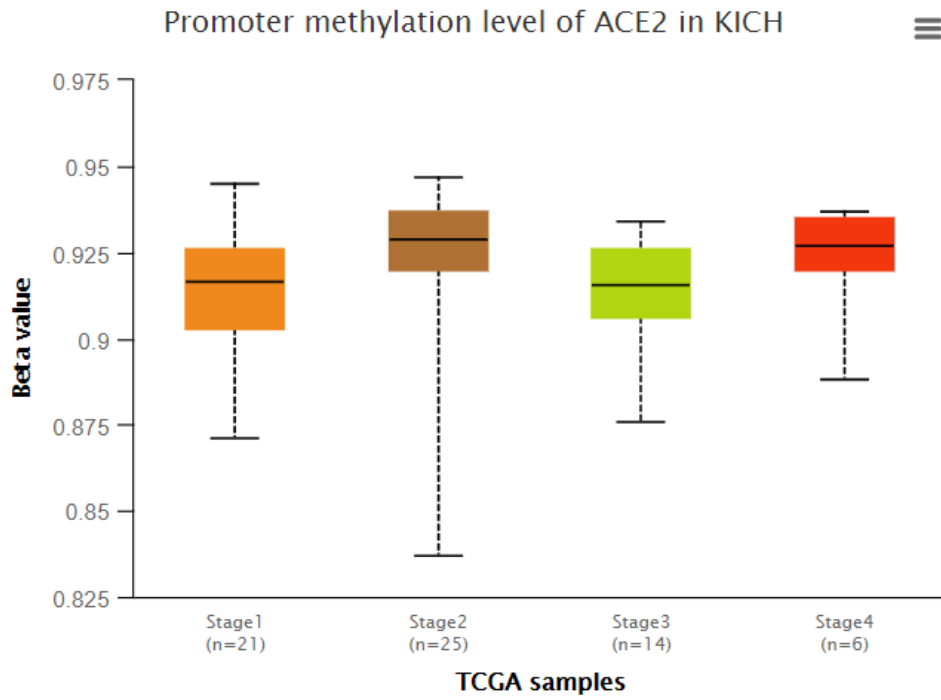

# Figure S6

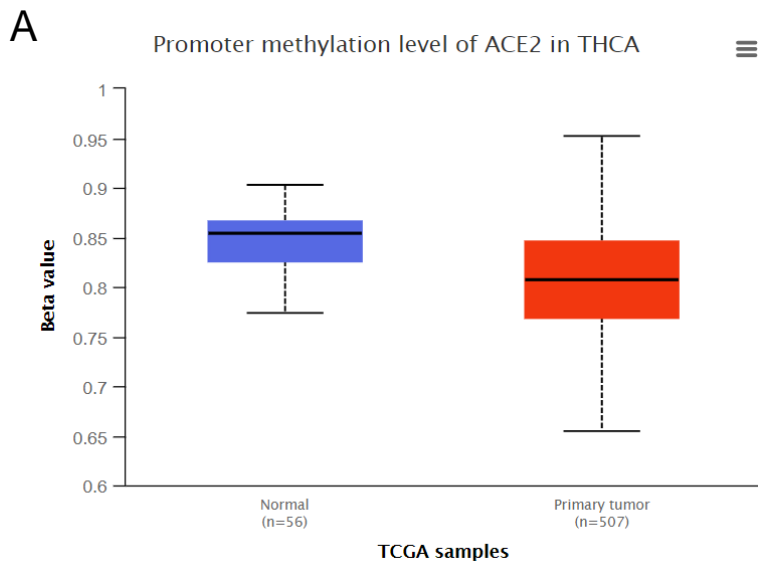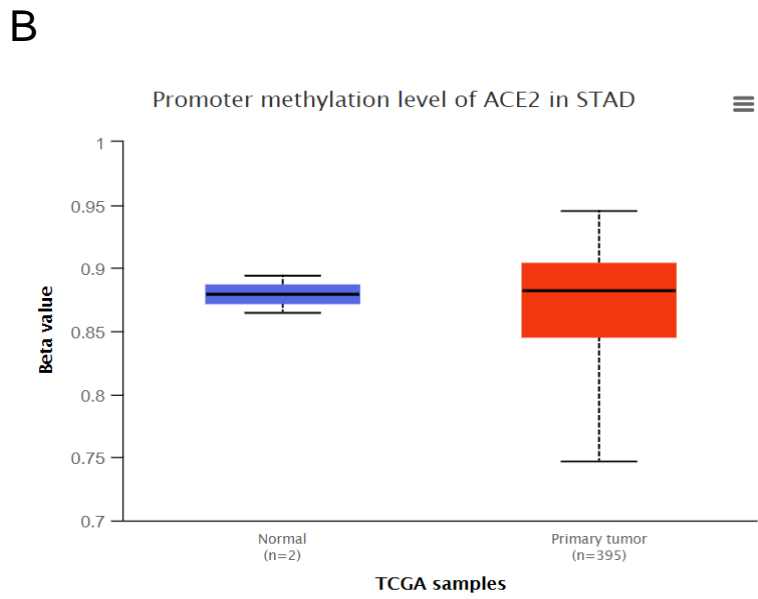

# Figure S7

## Disease free survival

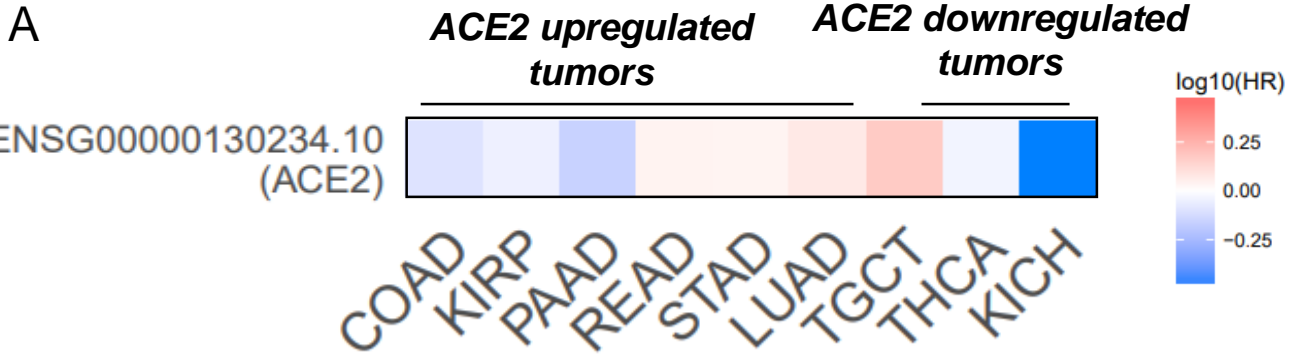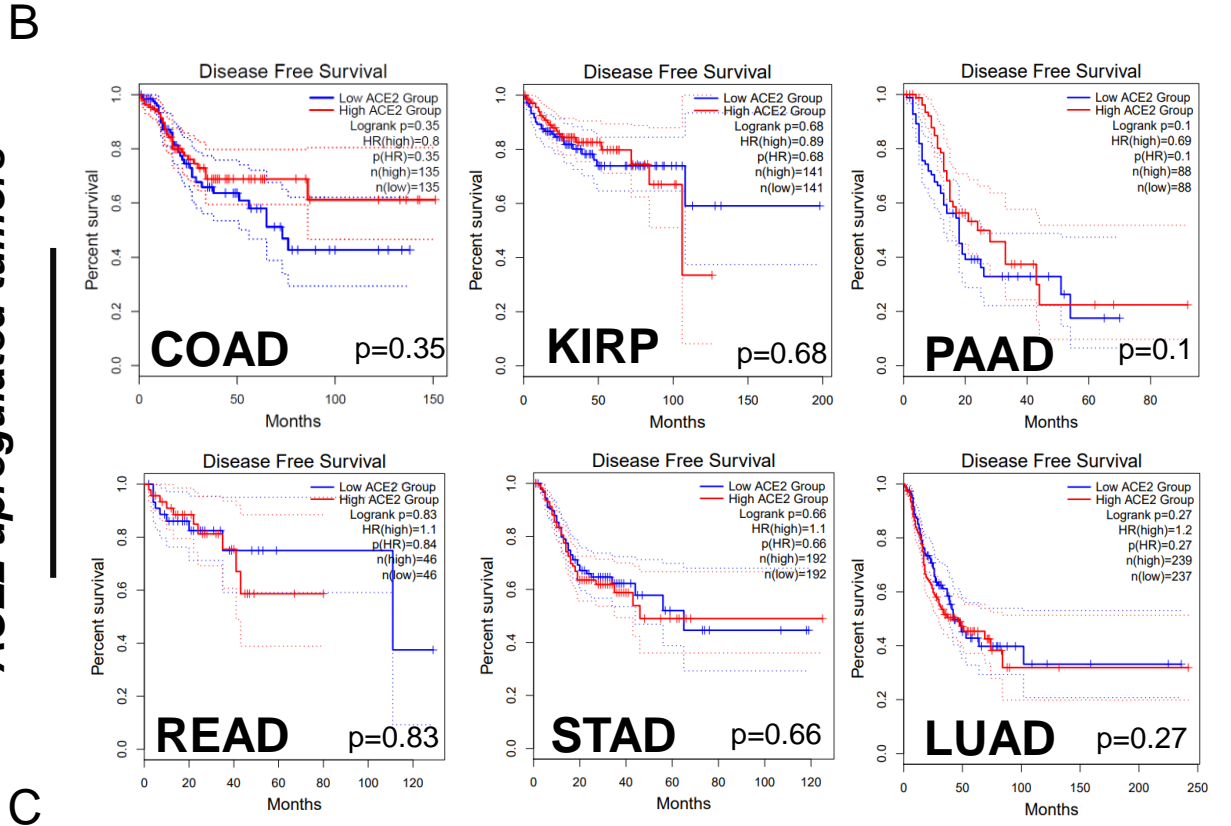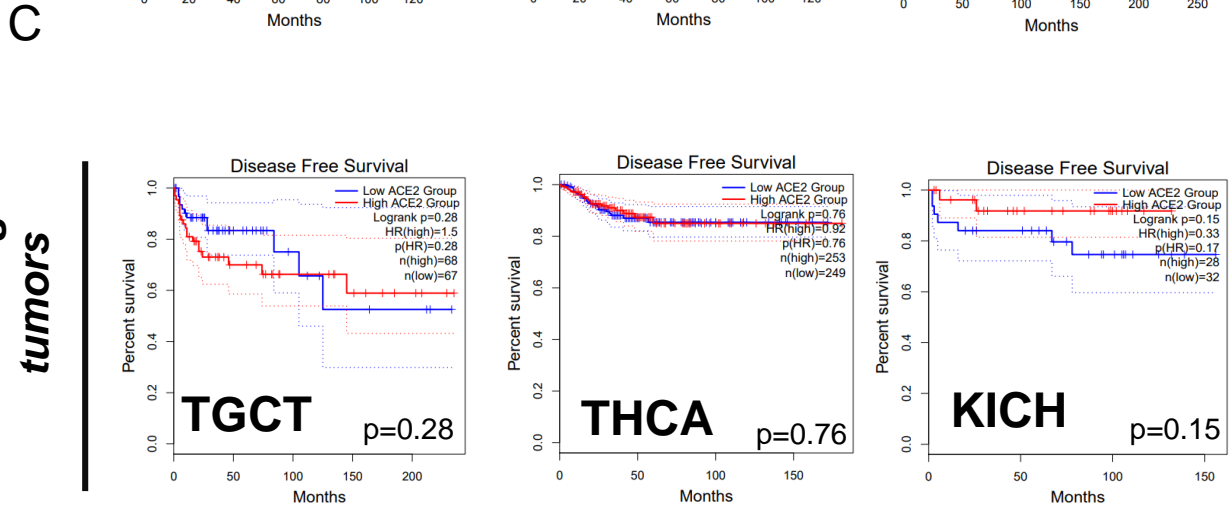



Figure S8  
Overall survival

A

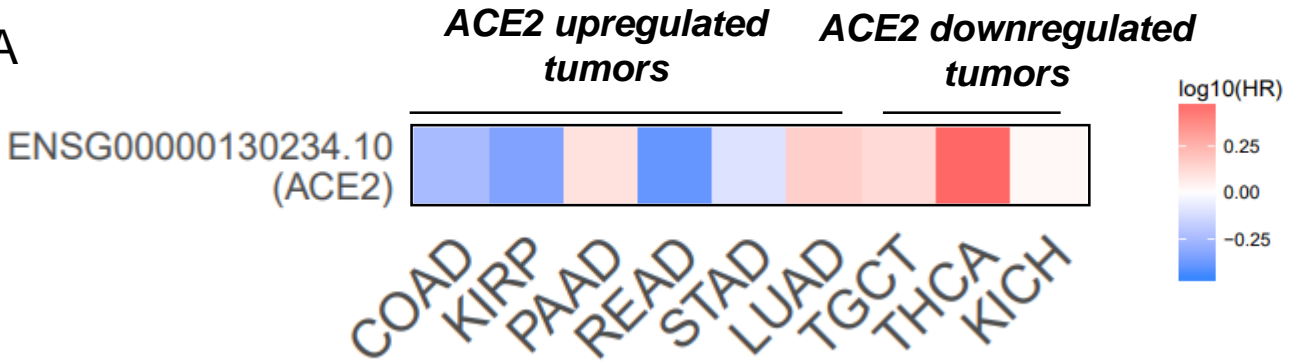

B

ACE2 upregulated tumors

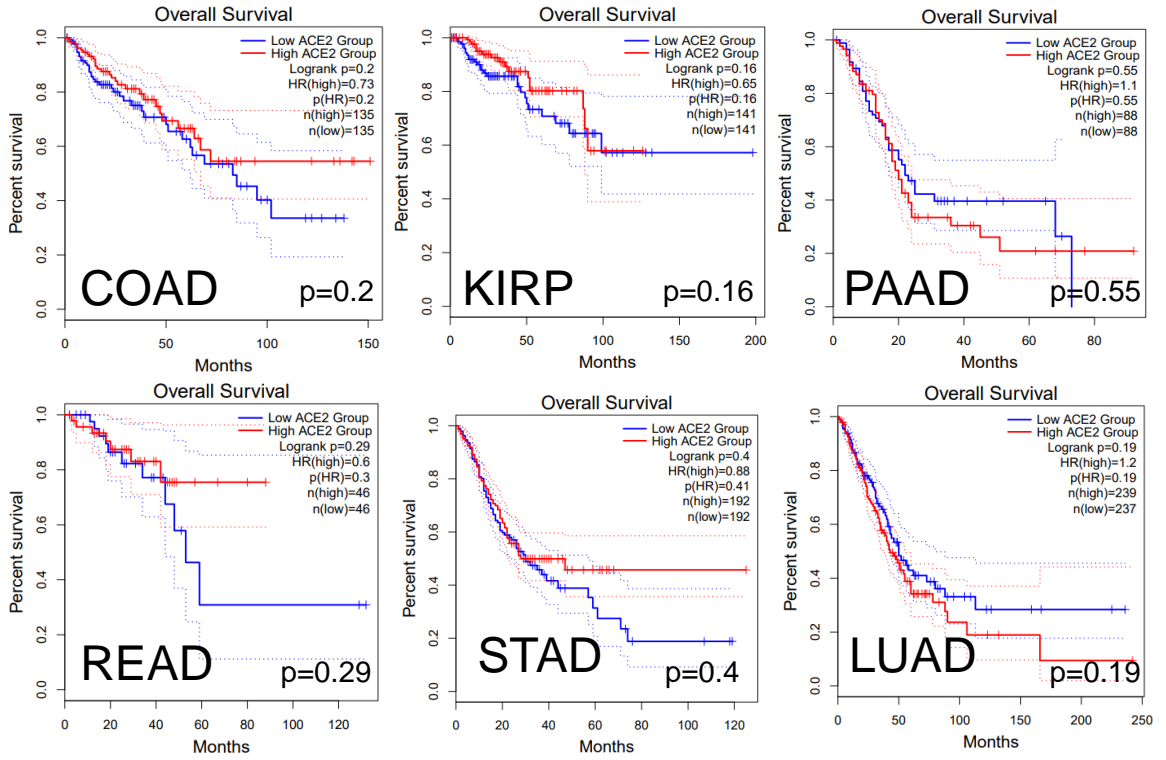

C

ACE2 downregulated tumors

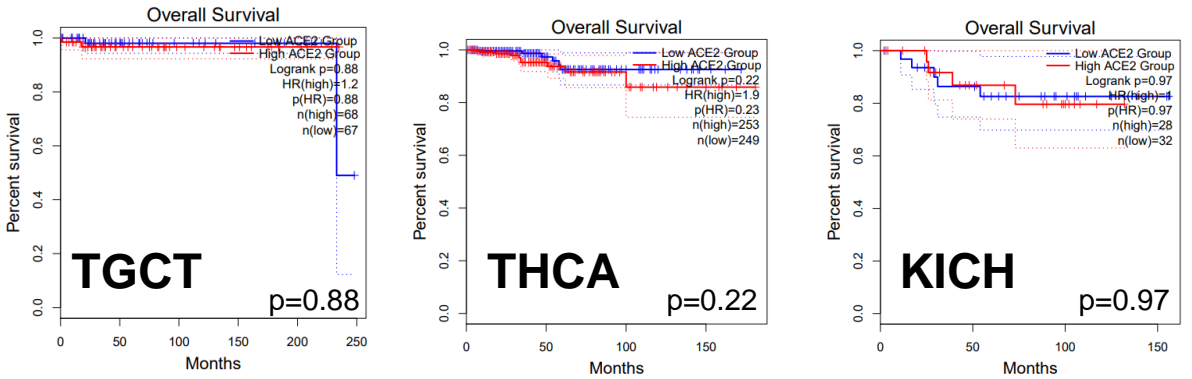



Figure S9

A

Disease free survival

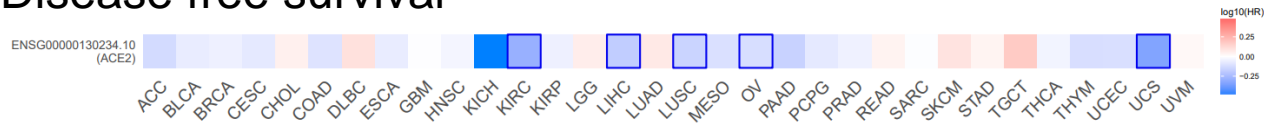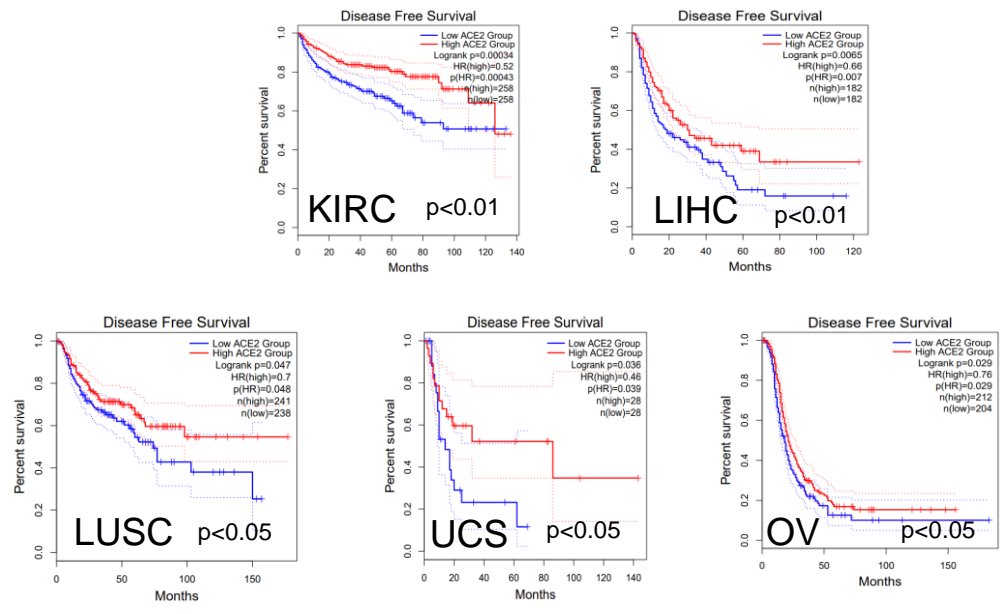

B

Overall survival

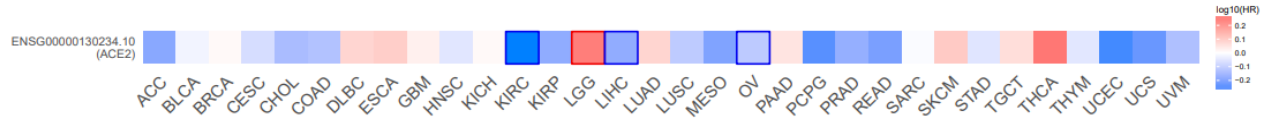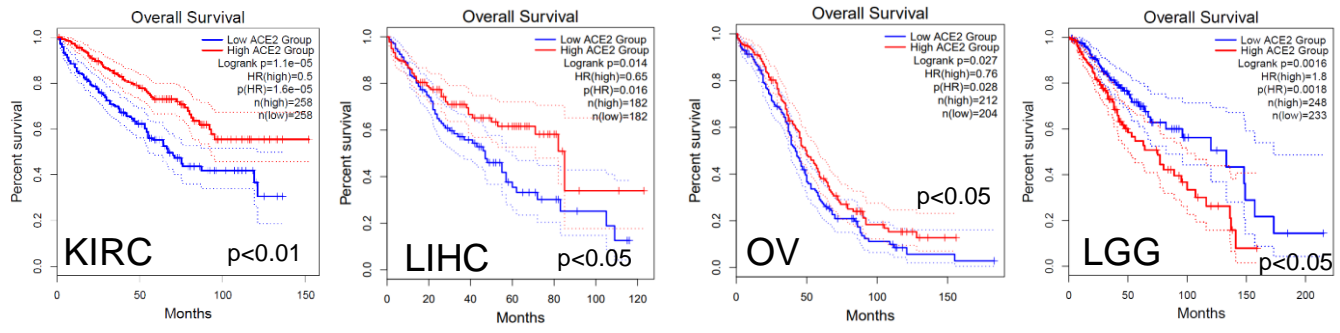

Supplement: MOESM1 [file 17952990]
